# Supplementary material for: A study of the optical properties of wide bandgap oxides for a transparent photovoltaics platform
Source: Royal Society of Chemistry journal article supplement (doi:10.1039/d3tc03122e), 2023-01-01
Supplement: d3tc03122e1.pdf [file d3tc03122e1.pdf]

## Electronic Supplementary Information (ESI)

### **A study of wide bandgap oxides by their optical properties for transparent photovoltaics platform<sup>†</sup>**

Malkeshkumar Patel,<sup>a,b</sup> Shuvaraj Ghosh,<sup>a, b</sup> Jeong Eun Park,<sup>c</sup> Jungeun Song,<sup>d</sup> Dong-Wook Kim,<sup>\*,d</sup> and Joondong Kim,<sup>\*\*a,b</sup>

<sup>a</sup> Photoelectric and Energy Device Application Lab (PEDAL), Multidisciplinary Core Institute for Future Energies (MCIFE), South Korea

<sup>b</sup> Department of Electrical Engineering, Incheon National University, 119 Academy Rd. Yeonsu, Incheon, 22012, South Korea

<sup>c</sup> Applied Materials Korea, Ltd., Icheon 17379, South Korea

<sup>d</sup> Department of Physics, Ewha Womans University, Seoul, 03760 South Korea

\*Corresponding author: [dwkim@ewha.ac.kr](mailto:dwkim@ewha.ac.kr)

\*\*Corresponding author: [joonkim@inu.ac.kr](mailto:joonkim@inu.ac.kr)

**Table S1** Summary of tristimulus values and color coordinates of the TPV devices.

| Device      | Tri-stimulus values |       |       | color coordinates |       |
|-------------|---------------------|-------|-------|-------------------|-------|
|             | X                   | Y     | Z     | x                 | y     |
| ZnO-TPV     | 62.10               | 61.87 | 48.29 | 0.360             | 0.359 |
| Rutile-TPV  | 55.68               | 55.27 | 42.12 | 0.364             | 0.361 |
| Anatase-TPV | 59.35               | 59.01 | 45.43 | 0.362             | 0.360 |

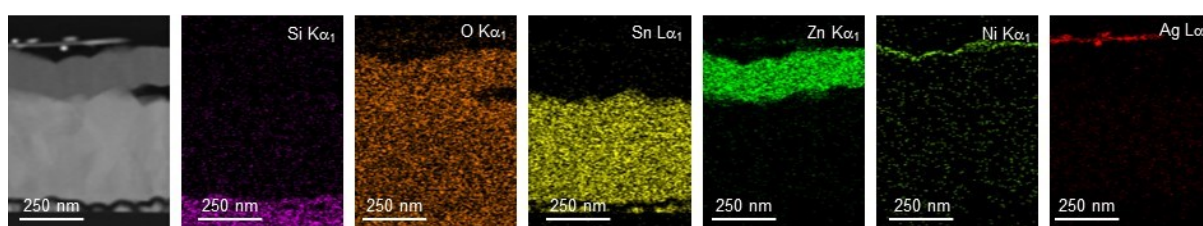

**Fig. S1** Elemental distribution of the ZnO-TPV device. A high-resolution transmission electron microscope image of the ZnO-TPV device with the AgNWs-ZnO top electrode. The corresponding elemental mapping images for Si, O, Sn, Zn, Ni, and Ag confirm the distribution of the elements. These structural and chemical characterizations were performed using a thermal field-emission transmission electron microscope (TALOS F200X, FEI) with energy-dispersive X-ray spectrometry.

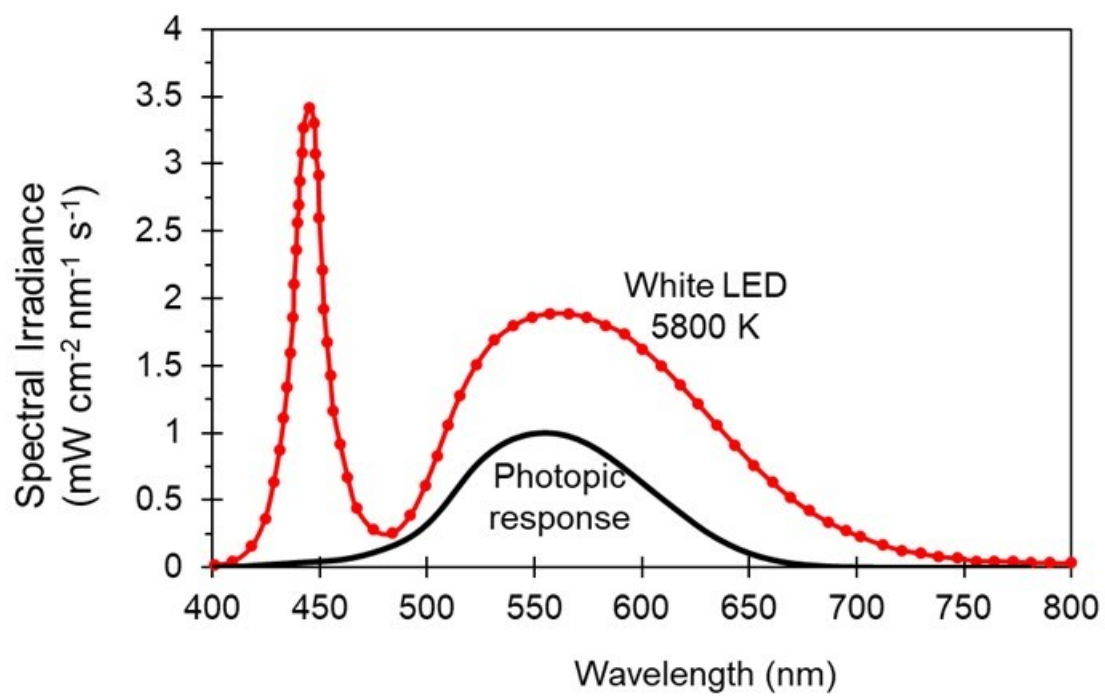

**Fig. S2** Spectral irradiance of the indoor white LED of 5800 K and photopic response.

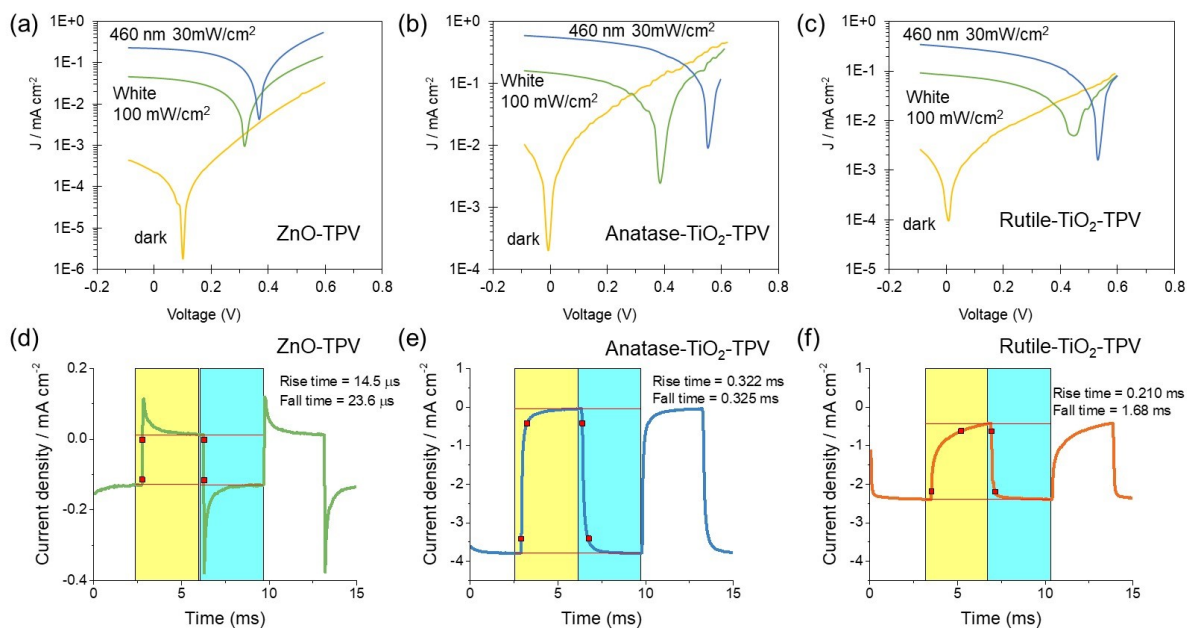

**Fig. S3** TPV device performances. Semi-log-scale J-V characteristic plots of the TPV device with (a) ZnO, (b) anatase-TiO<sub>2</sub>, and (c) rutile-TiO<sub>2</sub>. Photoresponse speed of the TPV device with (d) ZnO, (e) anatase-TiO<sub>2</sub>, and (f) rutile-TiO<sub>2</sub>. Rise and fall times were estimated using the standard function defined by the Origin tool. The yellow and cyan highlight the region corresponding to the fall and rise time, respectively.

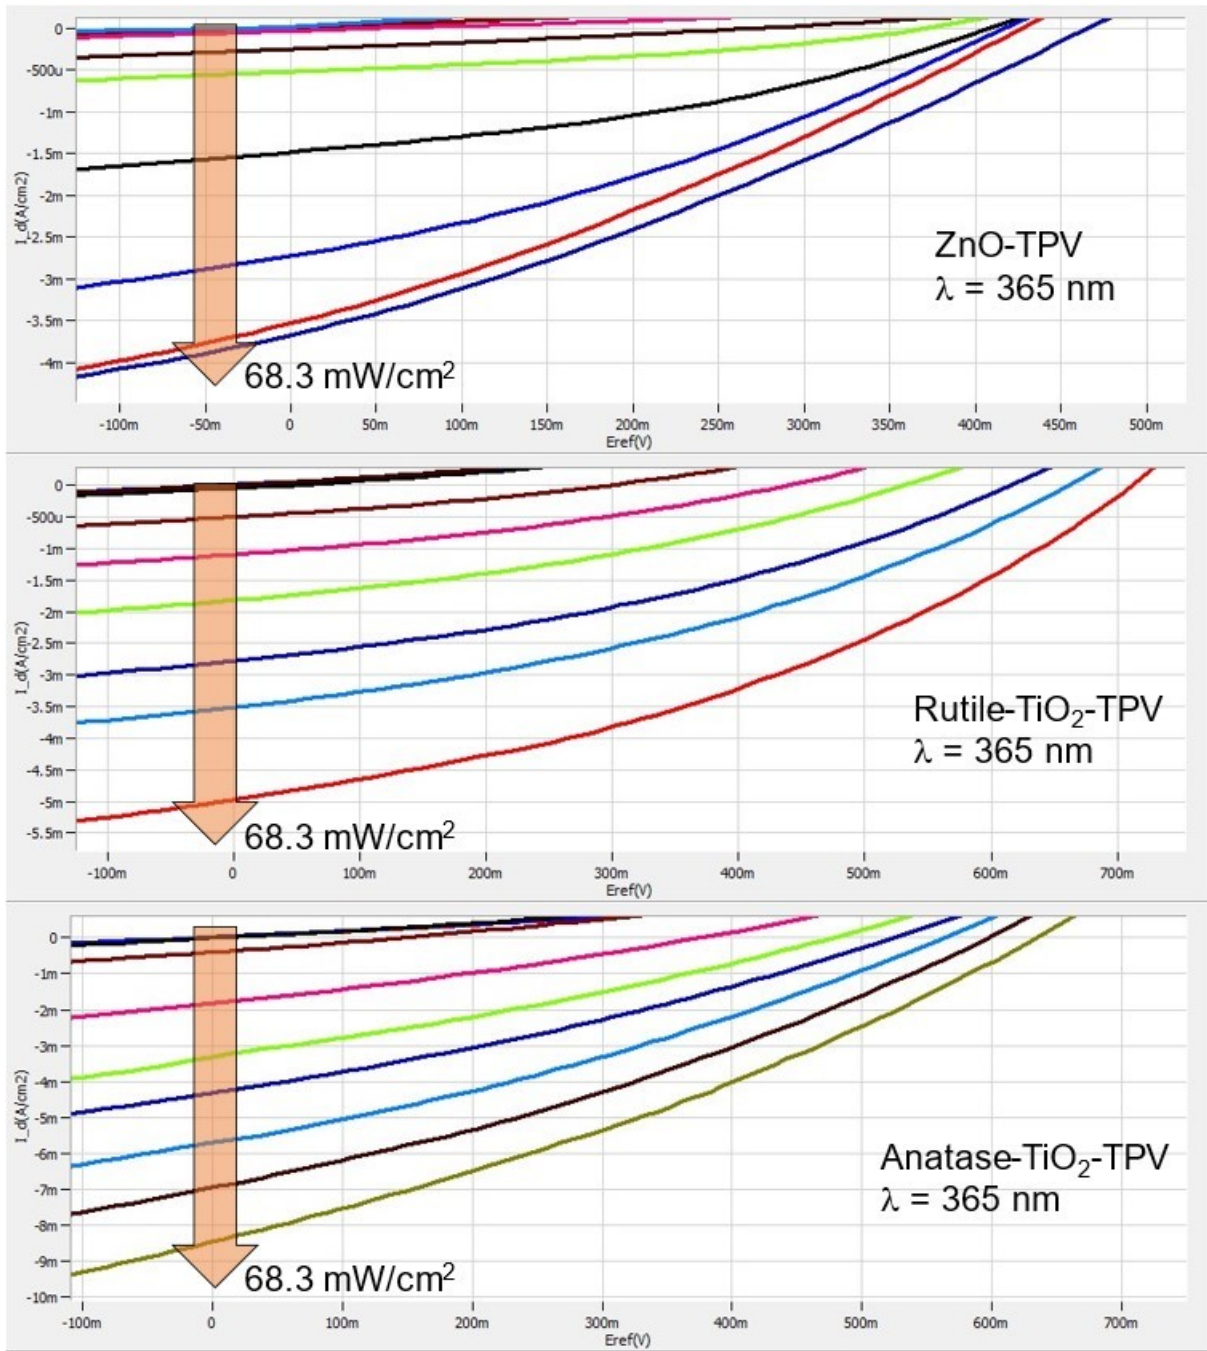

**Fig. S4** Measured J-V characteristics of ZnO, rutile- $\text{TiO}_2$ , and anatase- $\text{TiO}_2$  TPV device under the illumination of  $365 \text{ nm}$  wavelength. The light intensity was in the range of  $0.67$ - $68.3 \text{ mW}/\text{cm}^2$ .

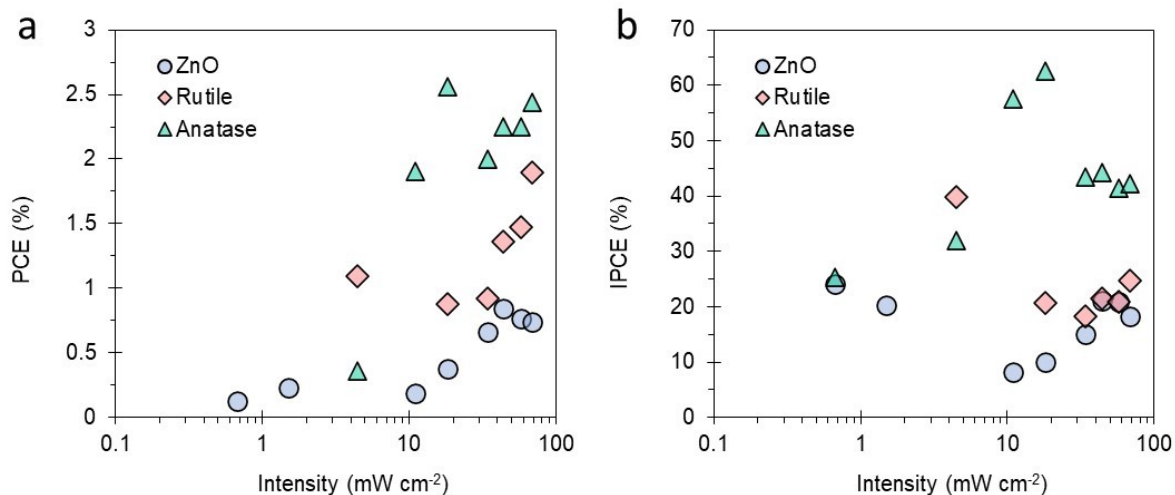

**Fig. S5** Illumination intensity-dependent performance of the TPV devices. (a) Power conversion efficiency and (b) incidental photon to current conversion efficiency (IPCE) versus light intensity. IPCE can be estimated using the relation

$$IPCE = \frac{1239.8 \times J_{SC} (mA/cm^2) \times 100\%}{\lambda (nm) \times P_{hv} (mAW/cm^2)},$$

where  $\lambda$  and  $P_{hv}$  is the wavelength and intensity of the light illumination.

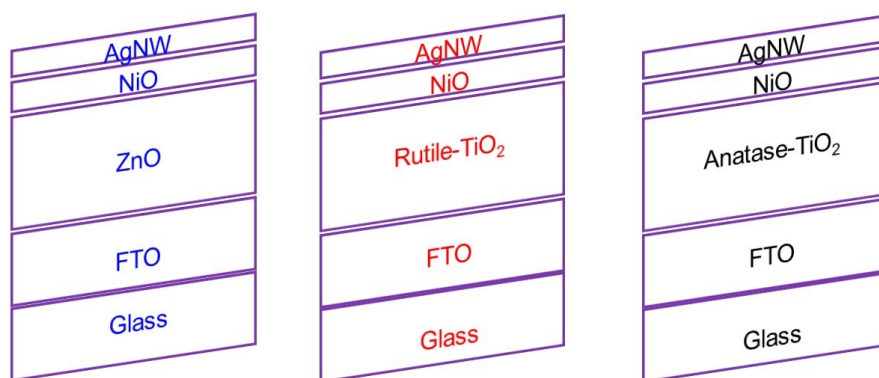

**Fig. S6** TPV-device architecture employed for the Mott-Schottky analysis.
